# Supplementary material for: Antibacterial Activity of Squaric Amide Derivative SA2 against Methicillin-Resistant Staphylococcus aureus
Source: Antibiotics (Basel). 2022 Oct 28;11(11):1497. doi: 10.3390/antibiotics11111497 (PMC9686510; doi:10.3390/antibiotics11111497)
Supplement: Supplementary file 1 [file antibiotics-11-01497-s001.zip › antibiotics-1935192-supplementary.pdf]

## Supplementary Information

### General

The  $^1\text{H}$  NMR,  $^{13}\text{C}$  NMR,  $^{19}\text{F}$  NMR spectra were measured in  $\text{CDCl}_3$  and MeOD solution on a Bruker AV-400 spectrometer using TMS as an internal reference. Coupling constant ( $J$ ) values are given in Hz. Multiplicities are designated by the following abbreviations: s, singlet; d, doublet; t, triplet; q, quartet; br, broad; m, multiplet. High-resolution mass spectra (HRMS) were performed on a Bruker microTOF-Q II Mass Spectrometer with ES ionization (ESI). All commercially available reagents were used as received. Thin-layer chromatography on silica (with  $\text{GF}_{254}$ ) was used to monitor all reactions. Products were purified by flash column chromatography on silica gel purchased from Qingdao Haiyang Chemical Co., Ltd. All solvents, organic and inorganic reagents were from commercial sources and used without purification unless otherwise noted. The primary amines **A1**–**A4** and **SA5** are purchased from Daicel chiral technologies (China) Co. Ltd. The mono-methyl ester **B** was prepared according to literatures reported method.[1] **SA1**, **SA2** and **SA3** are known compounds.[2–4] The characterization data of all new compounds were listed in the Supporting Information.

### The preparation of mono-methyl ester **B**[1]

The mixture of 3,4-dimethoxy-3-cyclobutene-1,2-dione (1.00 g, 7 mmol) and 3,5-bis(trifluoromethyl)aniline (1.20 mL, 7.7 mmol, 1.1 equiv) in MeOH (10 mL) was stirred at r.t. for 2d to give yellow precipitate. The yellow precipitate was filtered with the aid of cold MeOH to provide a yellow powder and dried in vacuo to (2.15 g, 90%).

**mono-methyl ester B**:  $^1\text{H}$  NMR (400 MHz, MeOD)  $\delta$ : 8.05 (s, 2H), 7.68 (s, 1H), 4.51 (s, 3H,  $\text{OCH}_3$ ).

### General procedure for preparation of squaramides (**SA1**–**SA4**) [2–4]

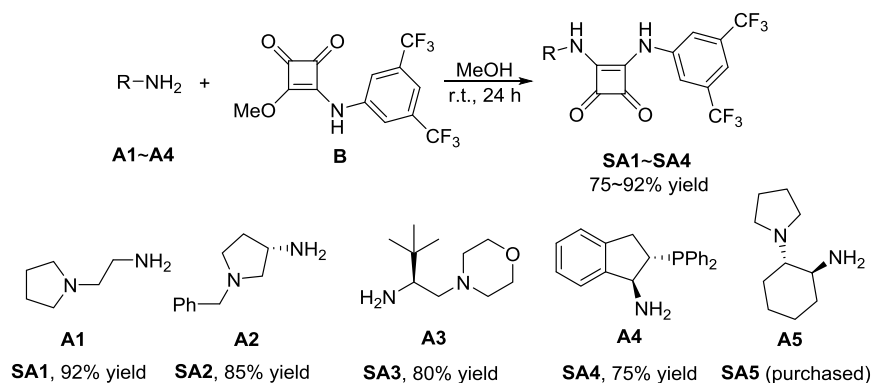

To a solution of mono-methyl ester (**B**, 1.02 g, 3.0 mmol) in MeOH (15 mL) was added a solution of corresponding amine (3.0 mmol) in MeOH (5 mL) at room temperature (r.t.). The mixture was stirred for 24 h. The reaction mixture was filtered, and the precipitate was washed with cold MeOH ( $2 \times 5.0$  mL) to afford pure squaramides **SA1**–**SA4**, respectively. They are analytical pure and used in the *vitro* and *vivo* experiments without further purification.

**SA1**: white powder, 92% yield; m.p. 145.2–146.1 °C;  $^1\text{H}$  NMR (400 MHz,  $\text{DMSO}-d_6$ )  $\delta$ : 10.31 (s, 1H), 8.06 (s, 2H), 7.80 (s, 1H), 7.66 (s, 1H), 3.75 (s, 2H), 3.35 (4H, merged), 2.65 (s, 2H), 2.51 (4H, merged);  $^{13}\text{C}$  NMR (101 MHz,  $\text{DMSO}-d_6$ )  $\delta$  185.4, 178.5, 162.3, 141.2, 131.5, 124.5, 121.8, 117.9, 114.6, 55.7, 53.5, 42.8, 23.1;  $^{19}\text{F}$  NMR (376 MHz,  $\text{DMSO}-d_6$ )  $\delta$ : -61.8; HRMS (ESI)  $m/z$  calcd. for  $\text{C}_{18}\text{H}_{18}\text{F}_6\text{N}_3\text{O}_2^+$   $[\text{M}+\text{H}]^+$ : 422.1298, found 422.1302.

SA2: light yellow powder, 85% yield; m.p. 167.1–168.5 °C;  $[\alpha]_D^{20} +63.7^\circ$  ( $c = 0.25$ ,  $\text{CH}_2\text{Cl}_2$ );  $^1\text{H}$  NMR (400 MHz, MeOD)  $\delta$ : 8.05 (bs, 2H), 7.55 (bs, 1H), 7.34–7.26 (m, 5H), 4.78 (s, 1H), 3.70 (s, 1H), 3.33 (s, 1H), 2.94 (br, 1H), 2.77 (bs, 2H), 2.45 (bs, 2H), 1.84 (bs, 1H), 4.73 (q,  $J = 6.9$  Hz, 1H), 4.38–4.26 (m, 2H), 3.82 (dd,  $J = 12.3$ , 6.8 Hz, 1H), 2.86 (t,  $J = 7.0$  Hz, 1H), 2.71 (s, 3H), 1.95 (bs, 1H), 1.52 (s, 3H), 1.35 (s, 3H);  $^{13}\text{C}$  NMR (100 MHz, MeOD)  $\delta$ : 169.0, 162.6, 140.9, 132.7, 128.8, 128.1, 127.1, 124.5, 121.8, 117.9, 115.2, 60.5, 59.5, 53.8, 52.2, 32.8;  $^{19}\text{F}$  NMR (376 MHz, MeOD)  $\delta$ : -64.5; HRMS (ESI)  $m/z$  calcd. for  $\text{C}_{23}\text{H}_{20}\text{F}_6\text{N}_3\text{O}_2^+ [\text{M}+\text{H}]^+$ : 484.1454, found 484.1453.

SA3: white powder, 80% yield; m.p. > 230 °C;  $[\alpha]_D^{20} +5.3^\circ$  ( $c = 0.22$ ,  $\text{CH}_2\text{Cl}_2$ );  $^1\text{H}$  NMR (400 MHz, MeOD)  $\delta$ : 8.14 (s, 2H), 7.59 (s, 1H), 4.18 (d,  $J = 10.28$  Hz, 1H), 3.62 (br, 4H), 2.70–2.65 (m, 3H), 2.48 (t,  $J = 12.0$  Hz, 1H), 2.37 (br, 2H), 1.05 (s, 9H);  $^{13}\text{C}$  NMR (100 MHz, MeOD)  $\delta$ : 184.3, 180.5, 170.7, 161.9, 140.8, 132.8 (d,  $J_{\text{C-F}} = 33$  Hz), 124.5, 121.8, 117.8, 115.5, 66.8, 60.4, 59.5, 53.9, 33.7, 25.7;  $^{19}\text{F}$  NMR (376 MHz, MeOD)  $\delta$ : -64.0; HRMS (ESI)  $m/z$  calcd. for  $\text{C}_{22}\text{H}_{26}\text{F}_6\text{N}_3\text{O}_3^+ [\text{M}+\text{H}]^+$ : 494.1873, found 494.1886.

SA4: white powder, 75% yield; m.p. 141.9–143.1 °C;  $[\alpha]_D^{20} +149.4^\circ$  ( $c = 0.05$ ,  $\text{CH}_2\text{Cl}_2$ );  $^1\text{H}$  NMR (400 MHz, Chloroform-*d*)  $\delta$ : 9.79 (s, 1H), 8.04 (s, 2H), 7.82 (d,  $J = 6.9$  Hz, 2H), 7.74 (d,  $J = 9.9$  Hz, 1H), 7.58 (s, 1H), 7.53 (t,  $J = 7.7$  Hz, 2H), 7.37–7.30 (m, 1H), 7.24 (t,  $J = 7.5$  Hz, 2H), 7.17 (s, 2H), 7.03–6.86 (m, 2H), 6.88–6.81 (m, 2H), 5.65–5.40 (m, 1H), 3.62 (s, 1H), 2.81 (s, 1H), 2.72–2.51 (m, 1H);  $^{13}\text{C}$  NMR (101 MHz, Chloroform-*d*)  $\delta$ : 184.7, 178.9, 167.8, 163.7, 141.0 (dd,  $J = 29.3$ , 8.08 Hz), 139.4, 136.7 (d,  $J = 12.5$  Hz), 135.3 (dd,  $J = 32.3$ , 12.1 Hz), 132.8 (d,  $J = 20.2$  Hz), 132.7 (q,  $J = 33.3$  Hz), 129.3 (d,  $J = 33.3$  Hz), 128.7 (d,  $J = 7.4$  Hz), 128.5 (t,  $J = 8.1$  Hz), 126.9, 124.4, 123.7, 123.0 (q,  $J_{\text{C-F}} = 272$  Hz), 122.9, 119.3, 117.1, 64.5 (d,  $J = 26.8$  Hz), 44.6 (d,  $J = 10.7$  Hz), 35.4 (d,  $J = 21.5$  Hz);  $^{19}\text{F}$  NMR (376 MHz, Chloroform-*d*)  $\delta$ : -63.1;  $^{31}\text{P}$  NMR (162 MHz, Chloroform-*d*)  $\delta$ : -8.4; HRMS (ESI)  $m/z$  Calculated for  $\text{C}_{33}\text{H}_{24}\text{F}_6\text{N}_2\text{O}_2\text{P}^+ [\text{M}+\text{H}]^+$ : 625.1469, found: 625.1470.

SA5 was purchased from Daicel Chiral Technologies (China) Co., Ltd. for only used in Lab; HRMS (ESI)  $m/z$  Calculated for  $\text{C}_{22}\text{H}_{24}\text{F}_6\text{N}_3\text{O}_2^+ [\text{M}+\text{H}]^+$ : 476.1767, found: 476.1767.

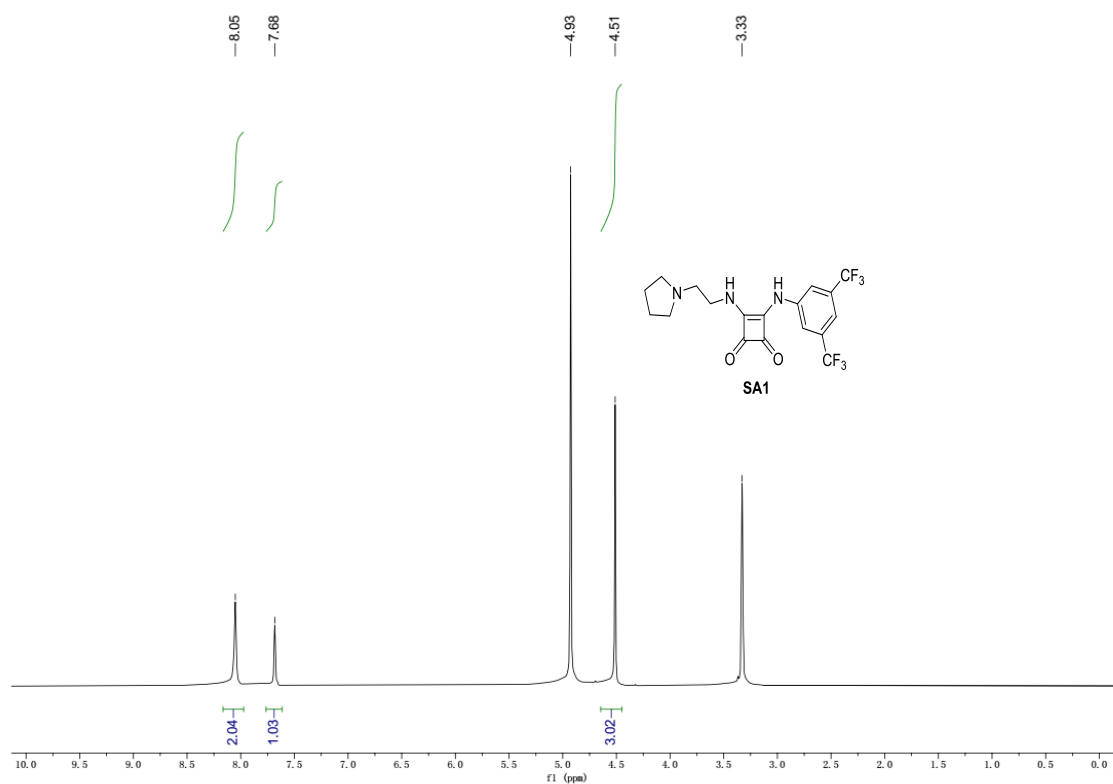<sup>1</sup>H NMR for **B**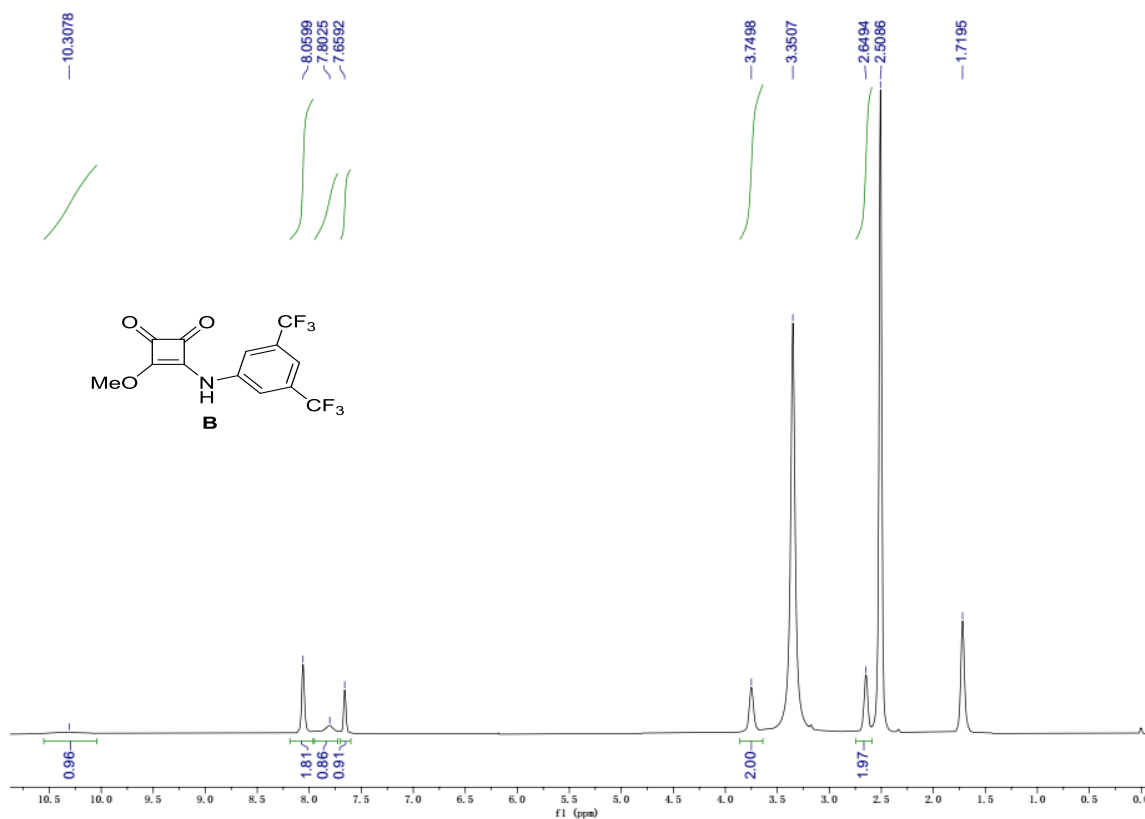<sup>1</sup>H NMR for **SA1**

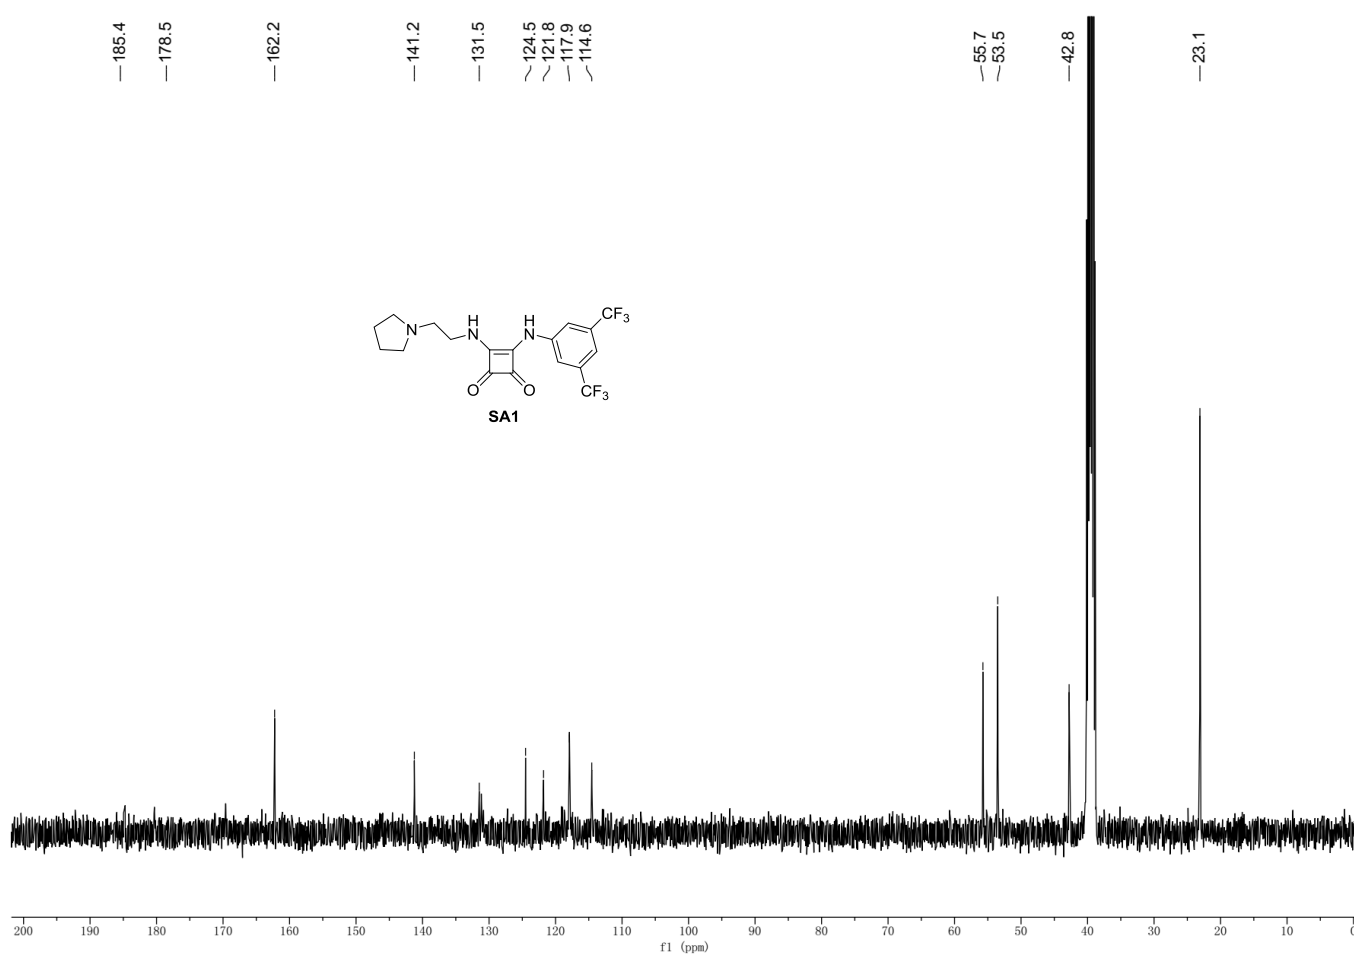<sup>13</sup>C NMR for SA1

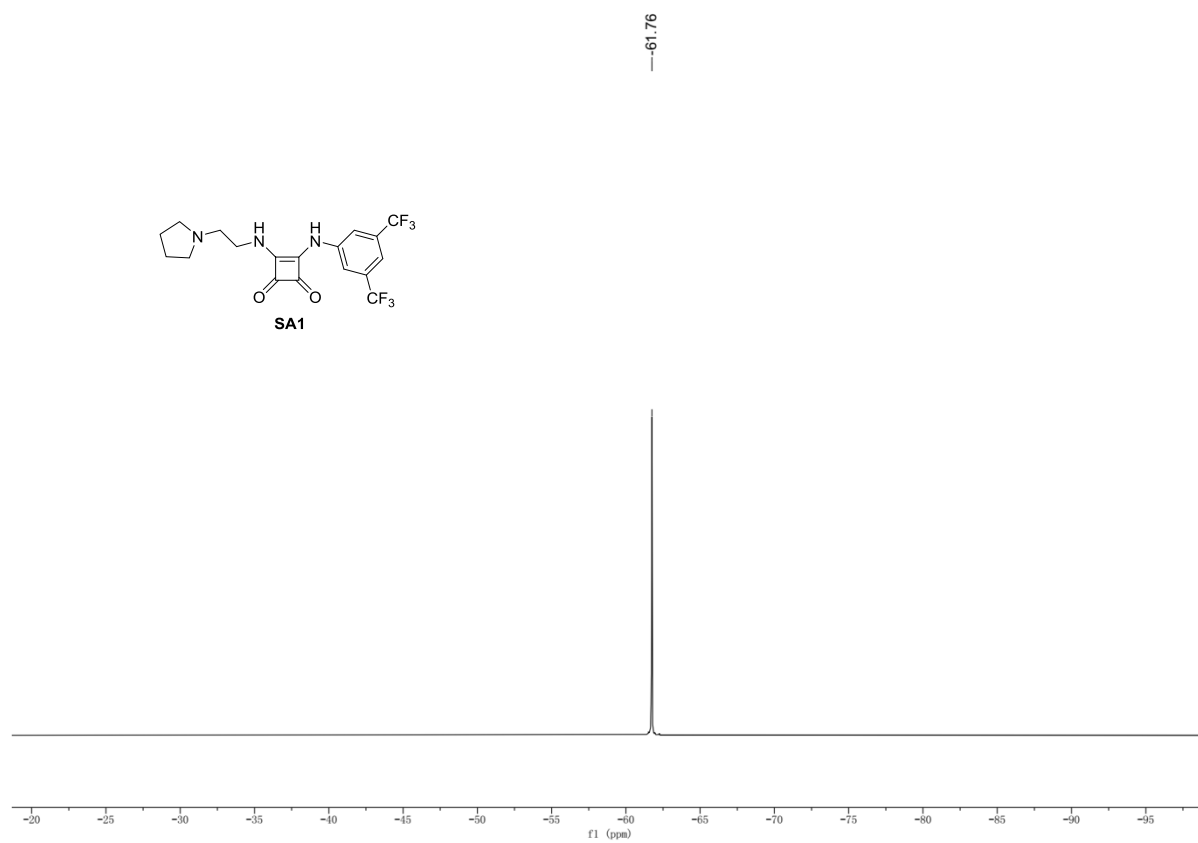 $^{19}\text{F}$  NMR for **SA1**

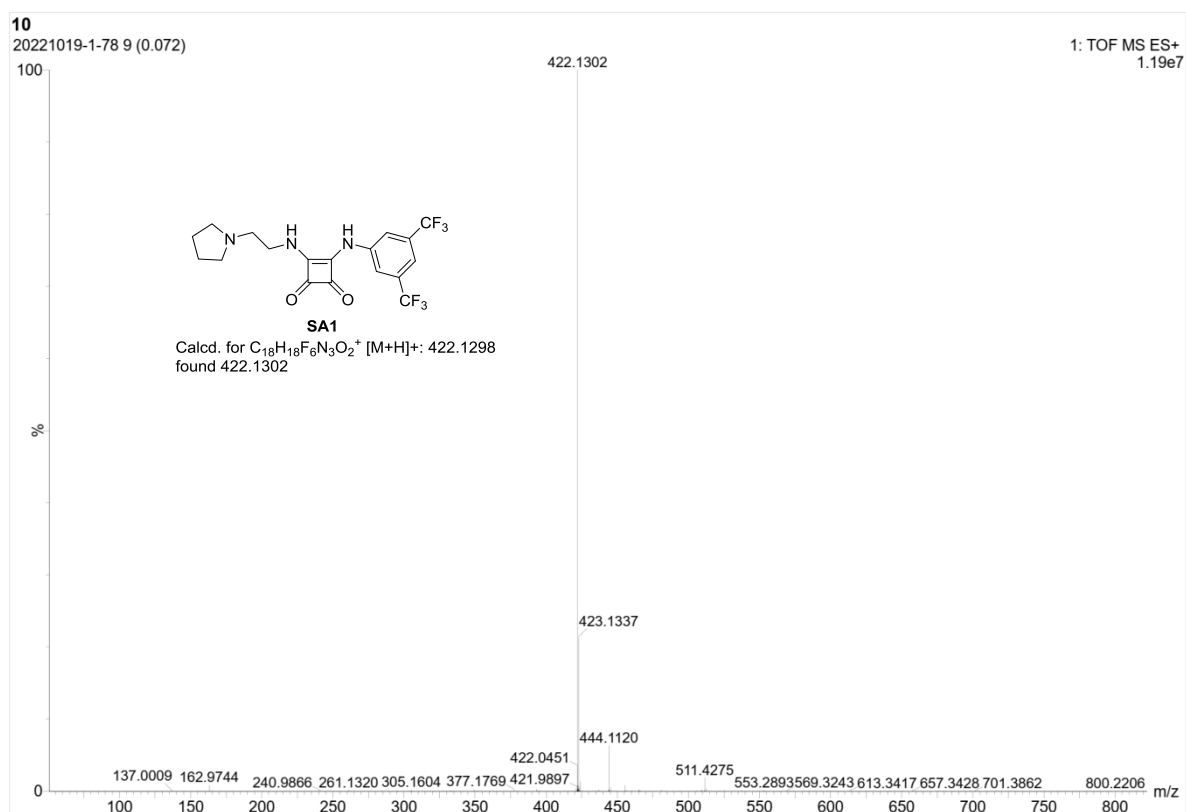

HRMS for SA1

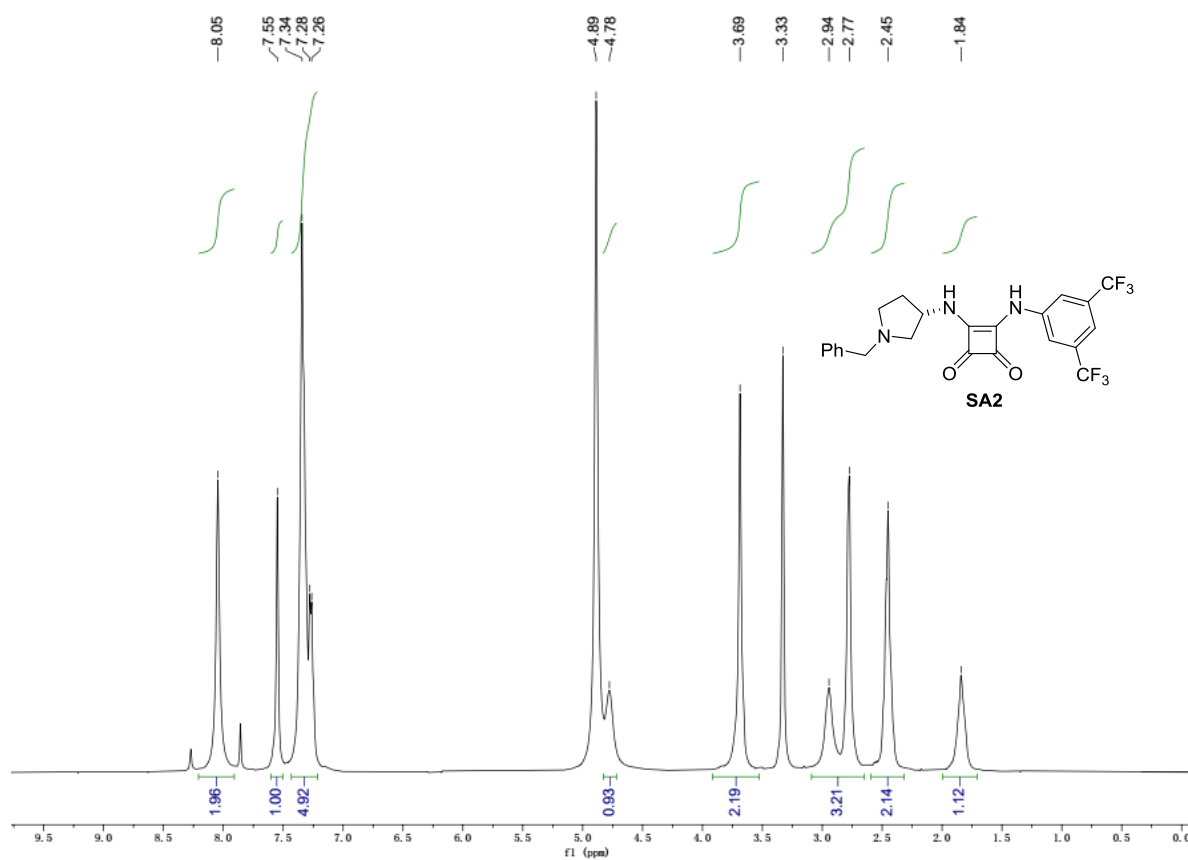

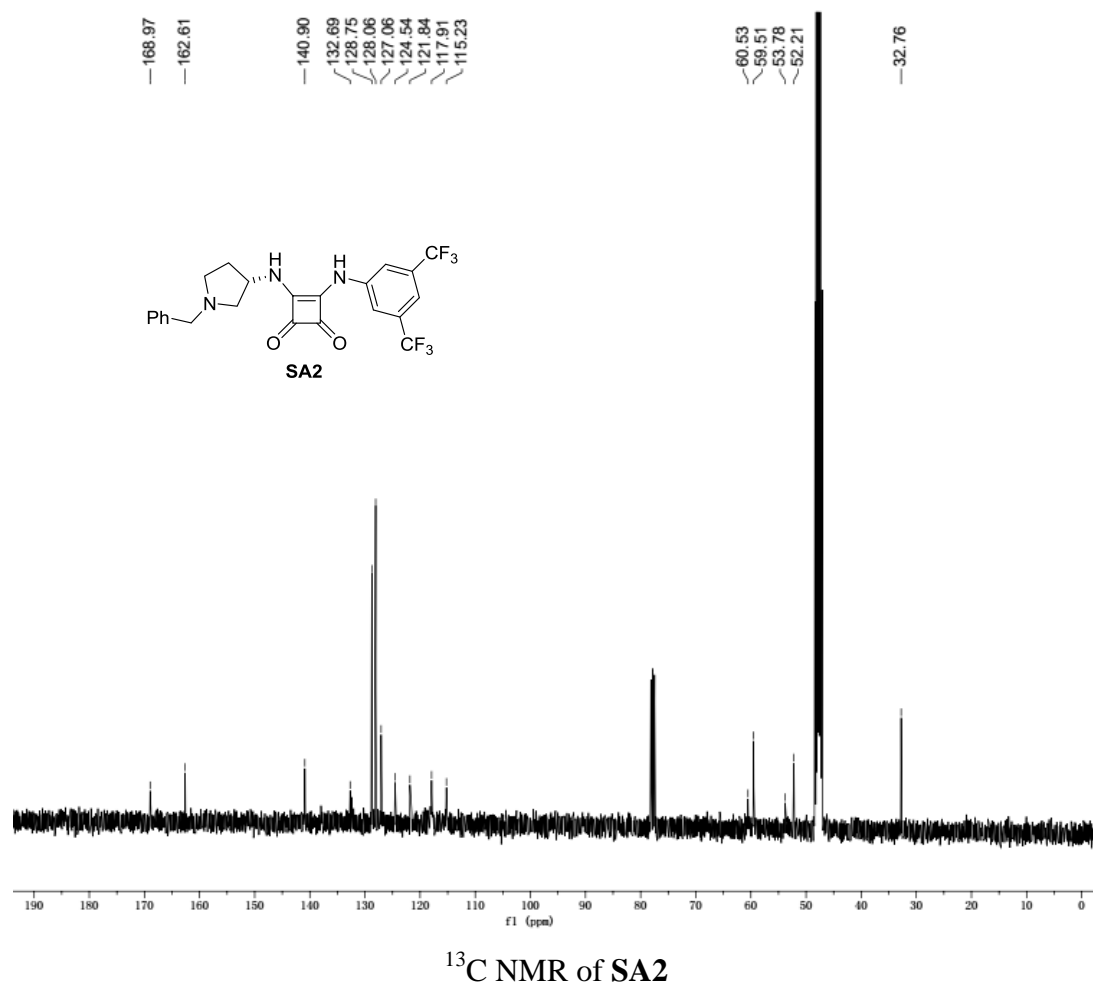

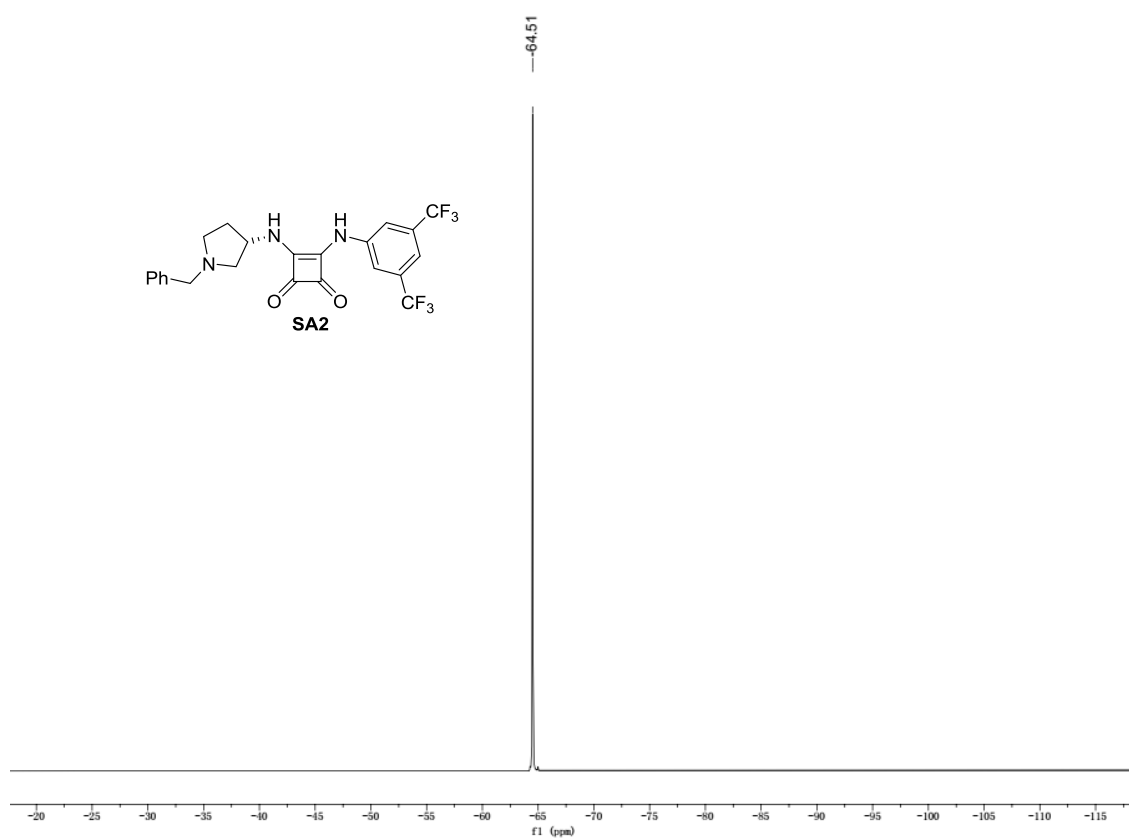 $^{19}\text{F}$  NMR of SA2

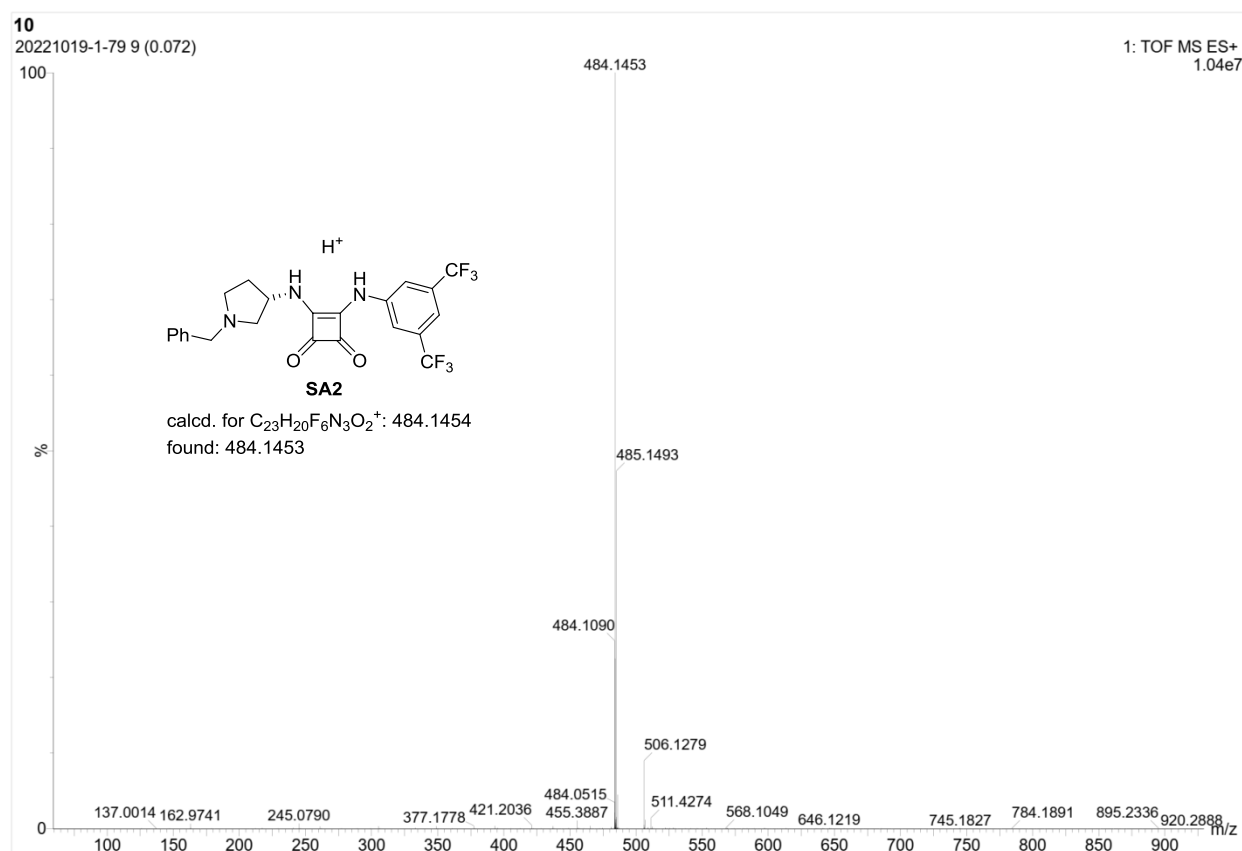HRMS of **SA2**

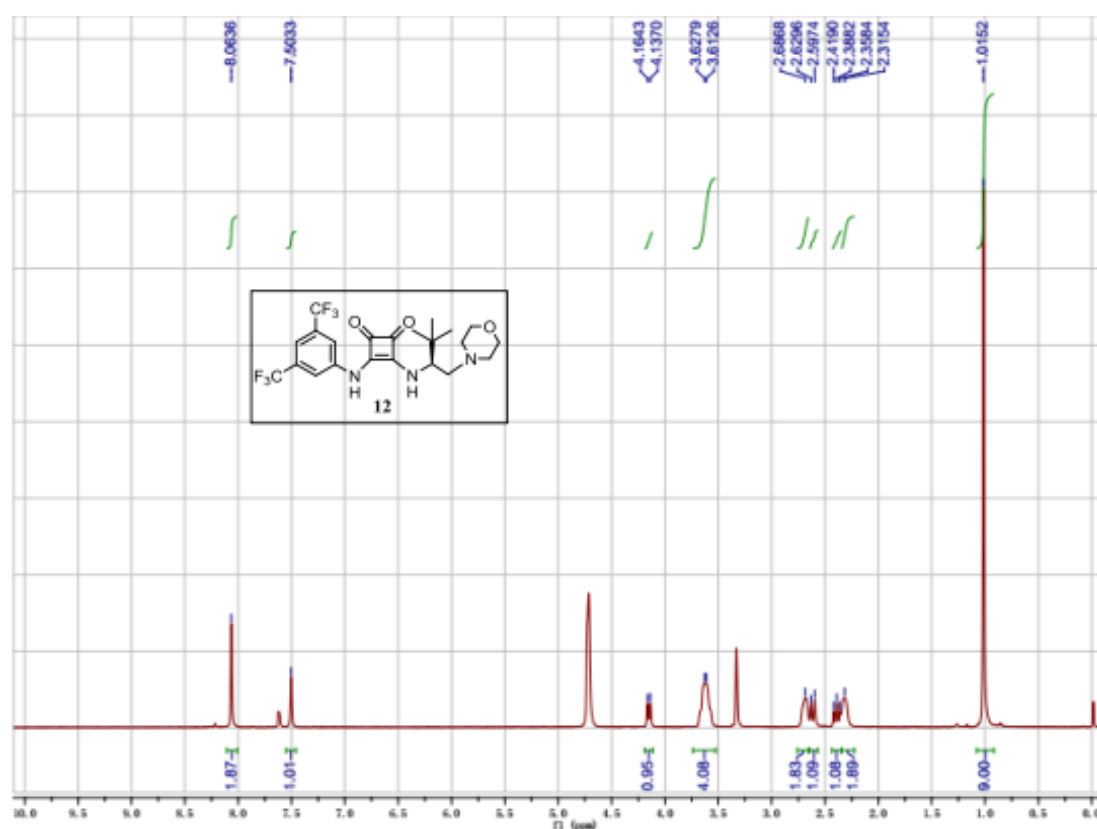<sup>1</sup>H NMR of SA3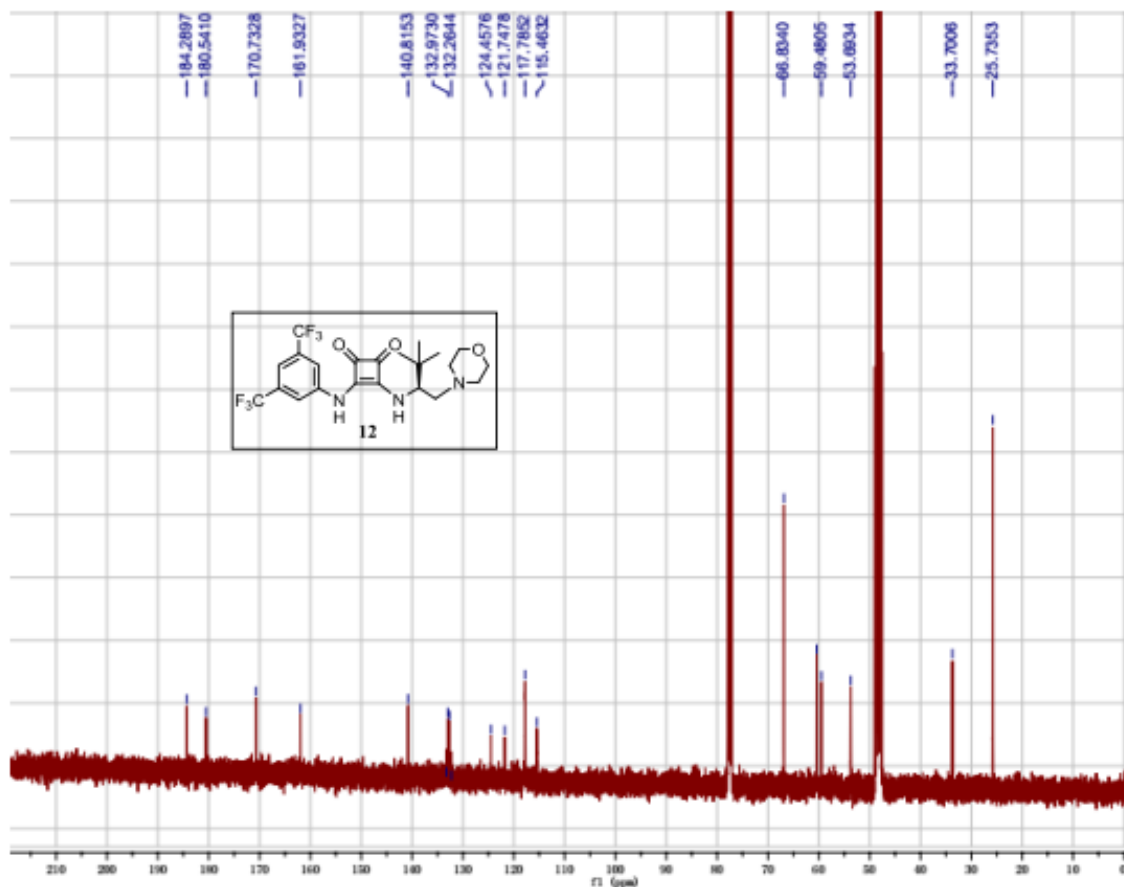<sup>13</sup>C NMR of SA3

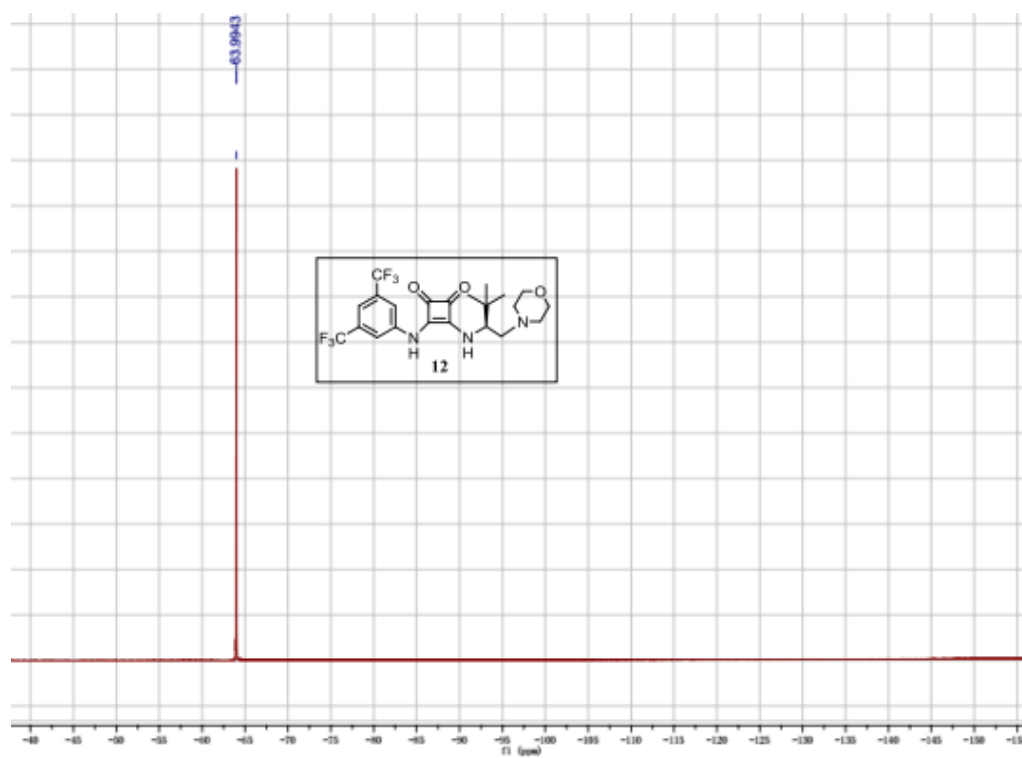 $^{19}\text{F}$  NMR of **SA3**

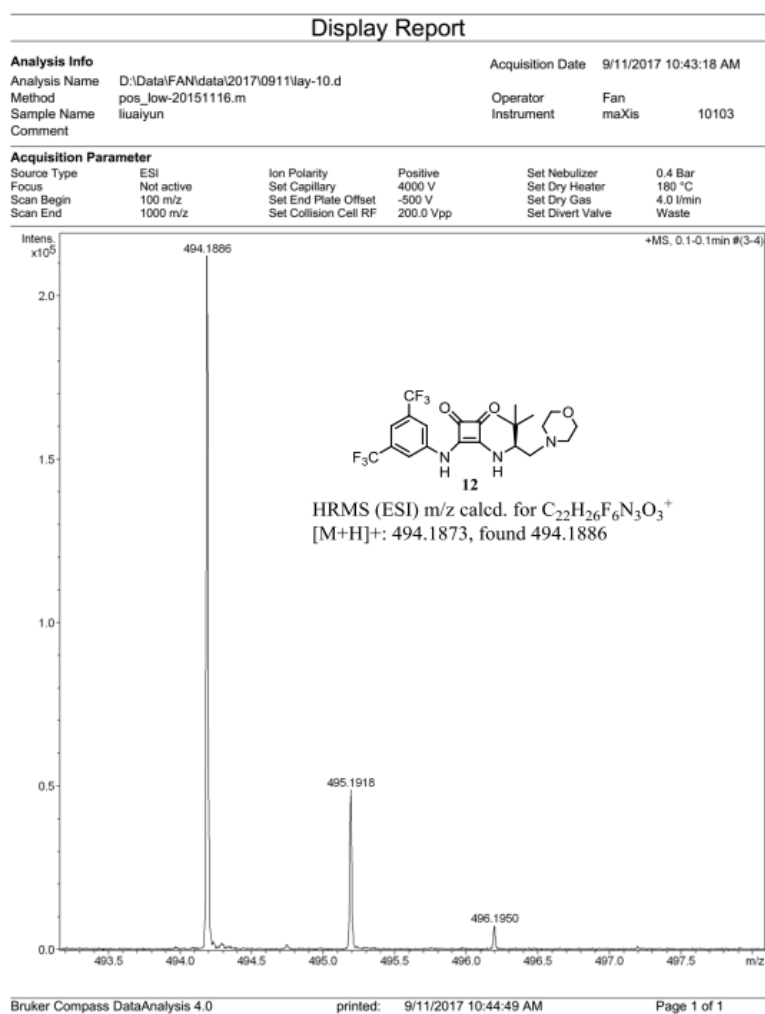

**HRMS for SA3**

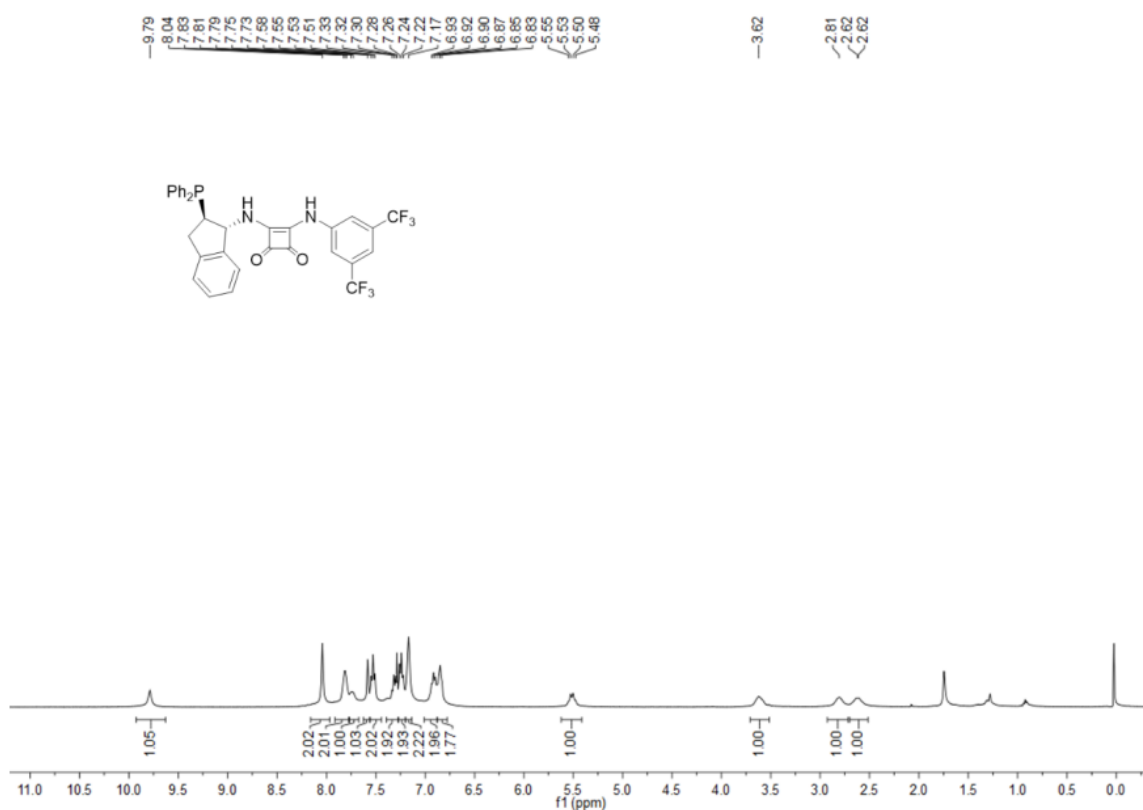<sup>1</sup>H NMR for SA4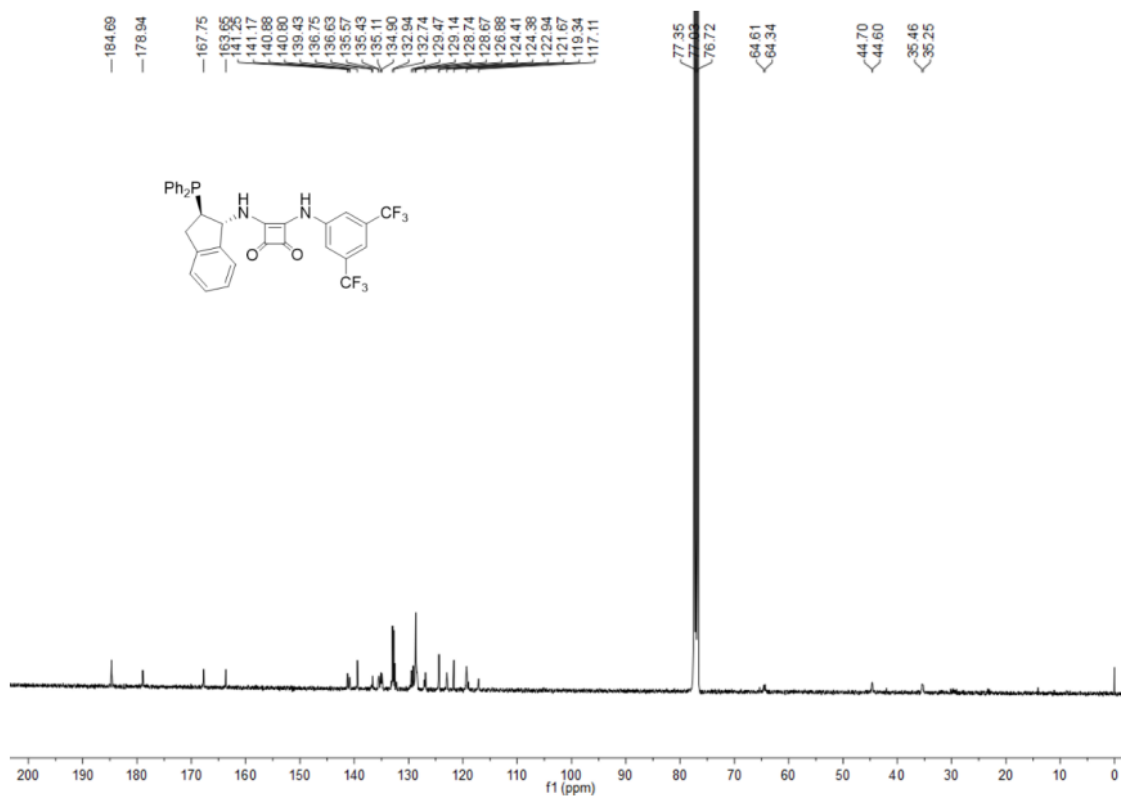<sup>13</sup>C NMR for SA4

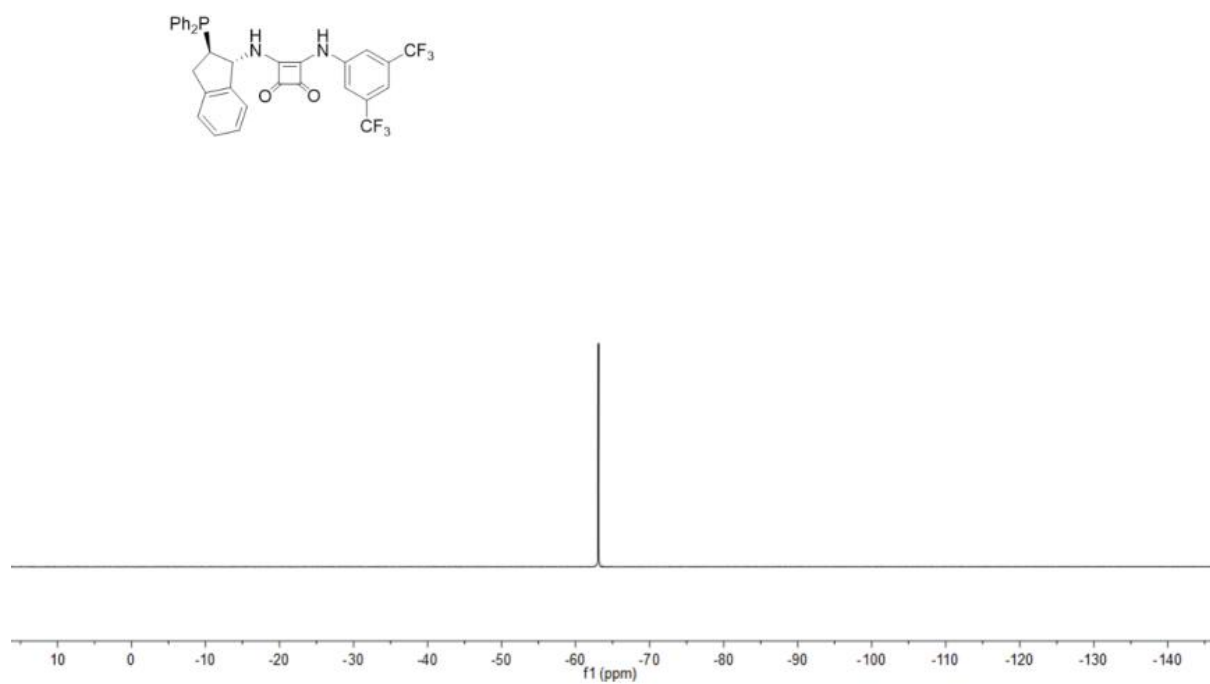 $^{19}\text{F}$  NMR for SA4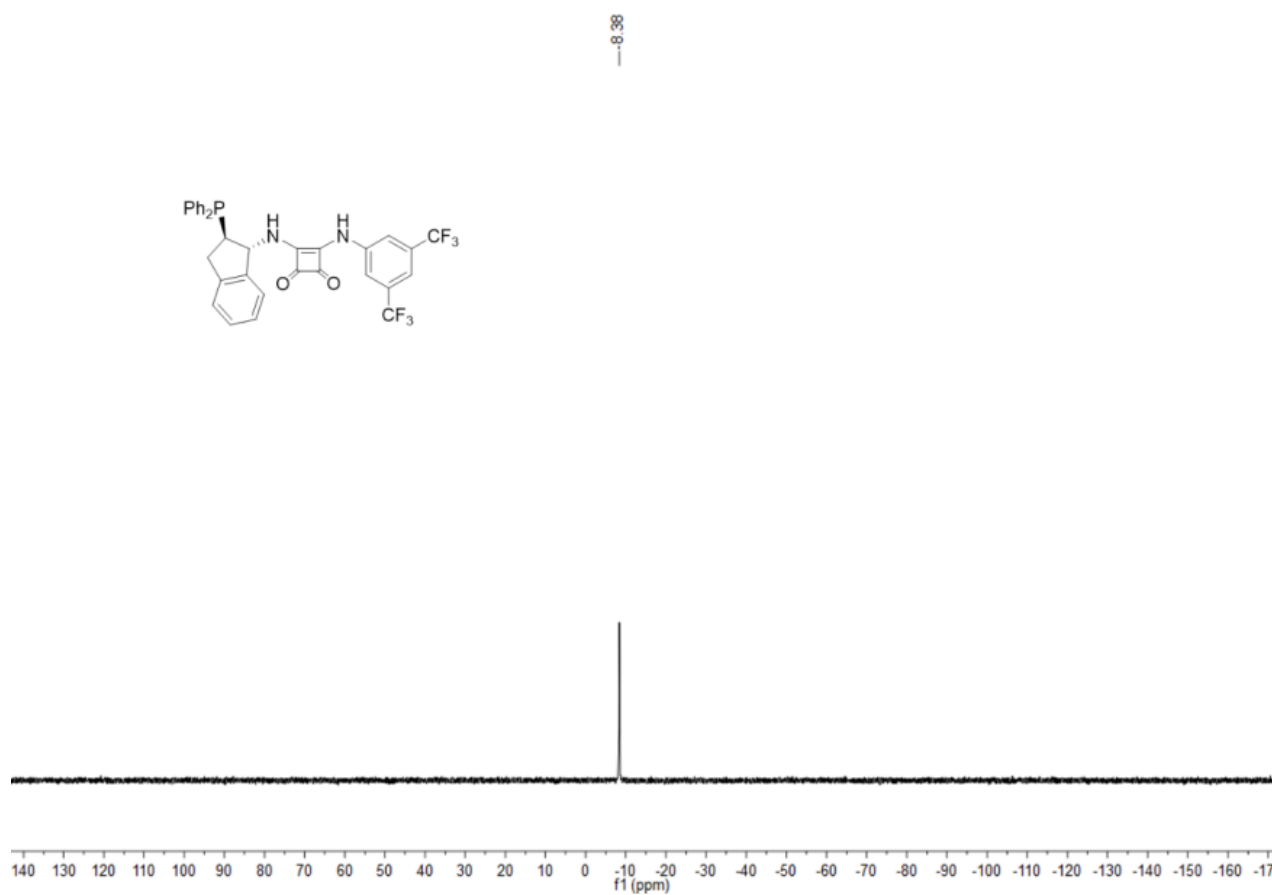 $^{31}\text{P}$  NMR for SA4

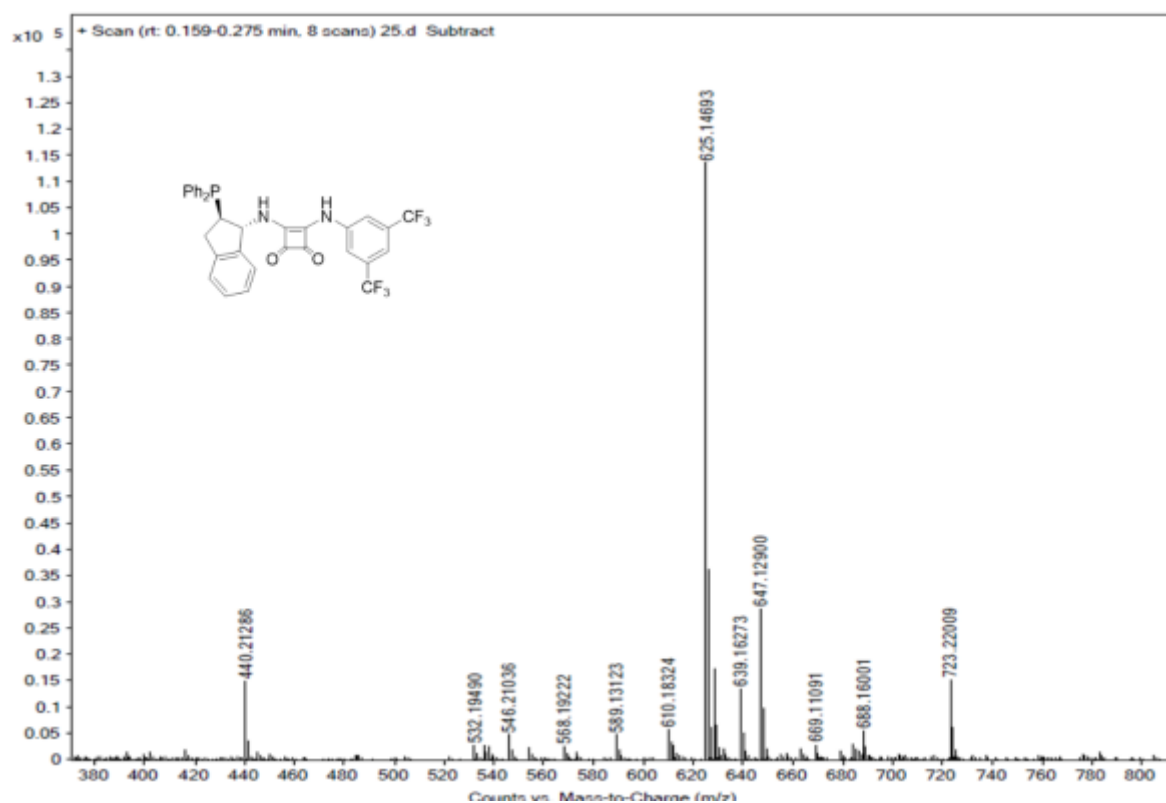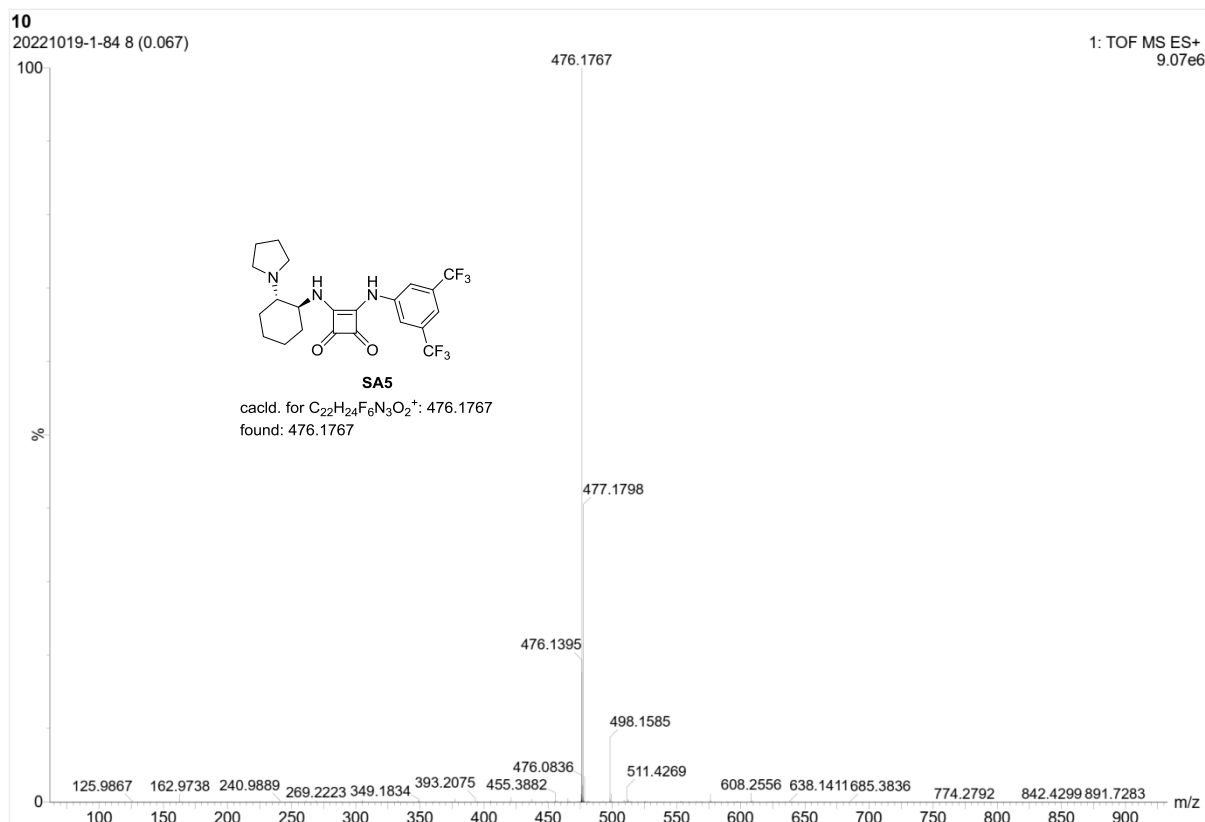

## References

- [1] Konishi H.; Lam T.Y.; Malerich J.P.; Rawal V.H. Enantioselective  $\alpha$ -amination of 1,3-dicarbonyl compounds using squaramide derivatives as hydrogen bonding catalysts. *Org Lett* **2010**, *12*, 2028–2031.
- [2] Kowalczyk R.; Nowak A.E.; Skarzewski J. Organocatalytic asymmetric addition of aliphatic thiols to nitro olefins and nitrodienes. *Tetrahedron: Asymmetry* **2013**, *24*, 505–514.
- [3] Zhu J.; Cui D.; Li Y.; He J.; Chen W.; Wang P. Enantioselective amination of nitroolefins under base-free and water-rich conditions using chiral bifunctional phase-transfer catalysts. *Org Biomol Chem* **2018**, *16*, 3012–3017.
- [4] Li Y.; Cui D.; Zhu J.; Huang P.; Tian Z.; Jia Y.; Wang P. Bifunctional phase-transfer catalysts for fixation of CO<sub>2</sub> with epoxides under ambient pressure. *Green Chem.* **2019**, *21*, 5231–5237.

**Supplementary Table S1** Anti-bacterial activity of SA compounds

| Compound/drug |     | MIC ( $\mu\text{g/mL}$ )         |                  |
|---------------|-----|----------------------------------|------------------|
|               |     | <i>S. aureus</i><br>(ATCC 29213) | MRSA<br>(USA300) |
| Compound      | SA1 | 32                               | 64               |
| Compound      | SA2 | 2–4                              | 4                |
| Compound      | SA3 | 64                               | 64               |
| Compound      | SA4 | >256                             | >256             |
| Compound      | SA5 | 64                               | 64               |
| Oxacillin     |     | 2                                | >256             |
| Ceftazidime   |     | 4                                | >256             |

**Supplementary Table S2** Primers of RT-PCR

| Gene        |         | Primer sequence (5'–3') |
|-------------|---------|-------------------------|
| <i>norB</i> | Forward | GCTACACCATCAACAGATACAGC |
|             | Reverse | ACGCCAAATGCTCCACCTAA    |
| <i>ald</i>  | Forward | TGTAGCTTGCACACCCGAAA    |
|             | Reverse | CAGCTTCCCATGCTTGTTCG    |
| <i>tdcB</i> | Forward | AGGCTATGGGGCAAAGGTTA    |
|             | Reverse | CGCCAACTGGTACGATGACT    |
| <i>gyrB</i> | Forward | ACAGGAATCGGTGGCGACTTTG  |
|             | Reverse | GCTCCATCCACATCGGCATCAG  |
